# Supplementary material for: Impact of Antiretroviral Therapy on Oral Health among Children Living with HIV: A Systematic Review and Meta-Analysis
Source: MDPI journal article supplement (doi:10.3390/ijerph191911943), 2022-09-21
Supplement: s1 [file s1]

## Supplemental Material 1. Search strategies with antiretroviral therapy

### PubMed

Searched on 03 Aug 2022

Results: 256

(((((HIV Infections[MeSH] OR HIV[MeSH] OR "sexually transmitted diseases, viral"[MeSH] OR AIDS[MeSH] OR hiv[tw] OR hiv-1[tw] OR hiv-2[tw] OR hiv1[tw] OR hiv2[tw] OR hiv infect\*[tw] OR human immunodeficiency virus[tw] OR human immunodeficiency virus[tw] OR human immunodeficiency virus[tw] OR human immune-deficiency virus[tw] OR ((human immun\*) AND (deficiency virus[tw]))) OR acquired immunodeficiency syndrome[tw] OR acquired immunodeficiency syndrome[tw] OR acquired immuno-deficiency syndrome[tw] OR acquired immune-deficiency syndrome[tw] OR ((acquired immun\*) AND (deficiency syndrome[tw])))) AND ("Adolescent"[Mesh] OR "Child"[Mesh] OR "Infant"[Mesh] OR "pediatric"[tw] OR "paediatric"[tw] OR "adolescent"[tw] OR "teen"[tw] OR "infant"[tw])) AND (((((((((((("Oral Health"[MeSH]) OR "Mouth Diseases"[MeSH]) OR "Oral Hygiene"[MeSH]) OR "Dental Caries"[MeSH]) OR "Periodontal Diseases"[MeSH]) OR "Gingival Diseases"[MeSH]) OR "Tooth Injuries"[MeSH]) OR "Mouth Neoplasms"[MeSH]) OR "Dentistry"[MeSH])) OR (((((((((((oral health[tw]) OR mouth disease\*[tw]) OR oral hygiene[tw]) OR mouth hygiene[tw]) OR dental caries[tw]) OR periodontal disease\*[tw]) OR gingival disease\*[tw]) OR tooth injur\*[tw]) OR mouth tumor[tw]) OR oral cancer[tw]) OR dentistry[tw])))) AND (((("Antiretroviral Therapy, Highly Active"[Mesh] OR "Anti-Retroviral Agents"[Mesh] OR "antiretroviral"[tw] OR "ART"[tw] OR "medication"[tw]))

**Medline** (Ovid MEDLINE(R) 1946 to December Week 4 2019, Ovid MEDLINE(R) In-Process & Other Non-Indexed Citations 26 July 2019)

Searched on 03 Aug 2022

Results: 243

1. exp HIV Infections/ or exp HIV/ or exp sexually transmitted diseases, viral/ or exp AIDS/
2. (hiv or hiv-1 or hiv-2 or hiv1 or hiv2 or hiv infect\* or human immunodeficiency virus or human immunodeficiency virus or human immuno-deficiency virus or human immune-deficiency virus).tw.
3. ((human immun\* and deficiency virus) or acquired immunodeficiency syndrome or acquired immunodeficiency syndrome or acquired immuno-deficiency syndrome or acquired immune-deficiency syndrome or (acquired immun\* and deficiency syndrome)).tw.
4. 1 or 2 or 3
5. exp adolescent/ or exp child/ or exp infant/
6. (pediatric or paediatric or adolescent or teen or infant).tw.

7. 5 or 6
8. exp Oral Health/ or exp Mouth Diseases/ or exp Oral Hygiene/ or exp Dental Caries/ or exp Periodontal Diseases/ or exp Gingival Diseases/ or exp Tooth Injuries/ or exp Mouth Neoplasms/ or exp Dentistry/
9. (oral health or mouth disease\* or oral hygiene or mouth hygiene or dental caries or periodontal disease\* or gingival disease\* or tooth injur\* or mouth tumor or oral cancer or dentistry).tw.
10. 8 or 9
11. 4 and 7 and 10
12. exp Antiretroviral Therapy, Highly Active/ or exp Anti-Retroviral Agents/
13. (antiretroviral or ART or medication).tw.
14. 12 or 13
15. 11 and 14

**Embase** (Embase Classic+Embase 1947 to 2018 December 28)

**Searched on** 03 Aug 2022

**Results:** 612

exp Human immunodeficiency virus infection/ or exp Human immunodeficiency virus/ or exp sexually transmitted disease/ or exp acquired immune deficiency syndrome/

(hiv or hiv-1 or hiv-2 or hiv1 or hiv2 or hiv infect\* or human immunodeficiency virus or human immunodeficiency virus or human immuno-deficiency virus or human immune-deficiency virus).tw.

((human immun\* and deficiency virus) or acquired immunodeficiency syndrome or acquired immunodeficiency syndrome or acquired immuno-deficiency syndrome or acquired immune-deficiency syndrome or (acquired immun\* and deficiency syndrome)).tw.

1 or 2 or 3

exp adolescent/ or exp child/ or exp infant/

(pediatric or paediatric or adolescent or teen or infant).tw.

5 or 6

exp mouth disease/ or exp mouth hygiene/ or exp dental caries/ or exp periodontal disease/ or exp gingiva disease/ or exp tooth injury/ or exp mouth tumor/ or exp dentistry/

(oral health or mouth disease\* or oral hygiene or mouth hygiene or dental caries or periodontal disease\* or gingival disease\* or tooth injur\* or mouth tumor or oral cancer or dentistry).tw.

8 or 9

4 and 7 and 10

exp highly active antiretroviral therapy/ or exp antiretrovirus agent/

(antiretroviral or ART or medication).tw.

12 or 13

11 and 14

## Scopus

**Searched on** 03 Aug 2022

**Results:** 199

(( ( TITLE-ABS-KEY ( "HIV Infections" OR hiv OR "sexually transmitted diseases, viral" OR Aids OR "hiv-1" OR "hiv-2" OR hiv1 OR hiv2 OR "human immunodeficiency virus" OR "human immunodeficiency virus" OR "human immuno-deficiency virus" OR "human immune-deficiency virus" ) OR TITLE-ABS-KEY ( "acquired immunodeficiency syndrome" OR "acquired immunodeficiency syndrome" OR "acquired immuno-deficiency syndrome" OR "acquired immune-deficiency syndrome" ) ) ) )

AND ( TITLE-ABS-KEY ( adolescent OR child OR infant OR pediatric OR paediatric OR teen ) )

AND ( TITLE-ABS-KEY ( "oral health" OR "Mouth Diseases" OR "Oral Hygiene" OR "Dental Caries" OR "Periodontal Diseases" OR "Gingival Diseases" OR "Tooth Injuries" OR "Mouth Neoplasms" OR "mouth tumor" OR "oral cancer" OR dentistry ) ) )

AND ( TITLE-ABS-KEY ( "Antiretroviral Therapy, Highly Active" OR "Anti-Retroviral Agents" OR antiretroviral OR art OR medication ) )

## Supplemental Material 2. Tables

**Table S1. Comparison of HIV-infected individuals under antiretroviral medications versus those without medications.**

| Study (Year)                               |                   | Exposure  | Control  | Number of subjects |         | Outcomes<br>OR                           | 95% CI |                              |
|--------------------------------------------|-------------------|-----------|----------|--------------------|---------|------------------------------------------|--------|------------------------------|
|                                            |                   |           |          | Exposure           | Control |                                          |        |                              |
| Dental caries prevalence and severity      |                   |           |          |                    |         |                                          |        |                              |
|                                            | Ponnam (2012)     | CLWH cART | CLWH NMD | 95                 | 95      | DMFT/dmft>0                              | 0.91   | (0.50,1.65) <sup>NS</sup>    |
| 2                                          | Oliscovicz (2015) | CLWH cART | CLWH NMD | 51                 | 14      | deft                                     | NR     | NR                           |
|                                            |                   | CLWH ART  | CLWH NMD | 46                 | 14      | deft                                     | NR     | NR                           |
|                                            |                   |           |          | 46                 | 14      | DMFT                                     | NR     | NR                           |
| Oral hygiene and periodontal status        |                   |           |          |                    |         |                                          |        |                              |
| 1                                          | Ponnam (2012)     | CLWH cART | CLWH NMD | 95                 | 95      | Gingivitis/<br>periodontitis             | 1.21   | (0.68, 2.16) <sup>NS</sup>   |
| 2                                          | Oliscovicz (2015) | CLWH cART | CLWH NMD | 51                 | 14      | Gingivitis                               | 0.73   | (0.14, 3.72) <sup>NS</sup>   |
|                                            |                   | CLWH MT   | CLWH NMD | 46                 | 14      | Gingivitis                               | 1.14   | (0.67, 1.96) <sup>NS</sup>   |
| Overall                                    |                   |           |          |                    |         |                                          | 0.82   | (0.46,1.44) <sup>NS</sup>    |
| None                                       |                   |           |          |                    |         | Oral hygiene status                      | (Nil)  | (Nil)                        |
| Oral-health related WHO clinical staging 2 |                   |           |          |                    |         |                                          |        |                              |
| 1                                          | Baghirath (2013)  | CLWH ART  | CLWH NMD | 50                 | 50      | Angular cheilitis <sup>a</sup>           | 1.00   | (0.10, 9.95) <sup>NS</sup>   |
| 2                                          | Divarkar (2015)   |           |          | 62                 | 55      |                                          | 0.09   | (0.00, 1.74) <sup>NS</sup>   |
| 3                                          | Jose (2013)       | CLWH cART | CLWH NMD | 47                 | 53      |                                          | 0.79   | (0.15, 4.22) <sup>NS</sup>   |
| Overall                                    |                   |           |          |                    |         |                                          | 0.58   | (0.17,1.99) <sup>NS</sup>    |
| 1                                          | Baghirath (2013)  | CLWH ART  | CLWH NMD | 50                 | 50      | Linear gingival<br>erythema <sup>a</sup> | 0.19   | (0.01, 4.10) <sup>NS</sup>   |
| 2                                          | Divarkar (2015)   |           |          | 62                 | 55      |                                          | 0.12   | (0.01, 2.38) <sup>NS</sup>   |
| 3                                          | Mensana (2019)    | CLWH cART | CLWH NMD | 24                 | 4       |                                          | 14.33  | (1.55, 132.16) <sup>NS</sup> |
| 4                                          | Jose (2013)       |           |          | 47                 | 53      |                                          | 1.15   | (0.41, 3.27) <sup>NS</sup>   |
| 5                                          | Oliscovicz (2015) |           |          | 51                 | 14      |                                          | 3.43   | (0.18, 65.81) <sup>NS</sup>  |
|                                            |                   | CLWH MT   | CLWH NMD | 46                 | 14      |                                          | 0.96   | (0.04, 24.77) <sup>NS</sup>  |
| Overall                                    |                   |           |          |                    |         |                                          | 1.29   | (0.58,2.88) <sup>NS</sup>    |

|                                            |                      |                |                |      |      |                                         |      |                             |  |
|--------------------------------------------|----------------------|----------------|----------------|------|------|-----------------------------------------|------|-----------------------------|--|
| 1                                          | Baghirath (2013)     | CLWH ART       | CLWH NMD       | 50   | 50   | Recurrent oral ulcerations <sup>a</sup> | 0.76 | (0.18, 3.26) <sup>NS</sup>  |  |
| 2                                          | Divarkar (2015)      |                |                | 62   | 55   |                                         | 1.09 | (0.30, 4.02) <sup>NS</sup>  |  |
| 3                                          | Jose (2013)          | CLWH cART      | CLWH NMD       | 47   | 53   |                                         | 4.04 | (1.12, 14.55) <sup>*↑</sup> |  |
| 4                                          | Oliscovicz (2015)    |                |                | 51   | 14   |                                         | 0.86 | (0.03, 22.29) <sup>NS</sup> |  |
|                                            |                      | CLWH MT        | CLWH NMD       | 46   | 14   |                                         | 0.96 | (0.04, 24.90) <sup>NS</sup> |  |
| Overall                                    |                      |                |                |      |      |                                         | 1.50 | (0.72, 3.13) <sup>NS</sup>  |  |
| 1                                          | Oliscovicz (2015)    | CLWH cART      | CLWH NMD       | 51   | 14   | Persistent parotid enlargement          | 0.02 | (0.00, 0.08) <sup>*↓</sup>  |  |
|                                            |                      | CLWH MT        | CLWH NMD       | 46   | 14   |                                         | 0.01 | (0.00, 0.07) <sup>*↓</sup>  |  |
| Overall                                    |                      |                |                |      |      |                                         | 0.01 | (0.00, 0.05) <sup>*↓</sup>  |  |
| Oral health-related WHO clinical staging 3 |                      |                |                |      |      |                                         |      |                             |  |
| 1                                          | Baghirath (2013)     | CLWH ART       | CLWH NMD       | 50   | 50   | Oral candidiasis <sup>a</sup>           | 0.39 | (0.15, 1.05) <sup>NS</sup>  |  |
| 2                                          | Divarkar (2015)      |                |                | 62   | 55   |                                         | 0.36 | (0.16,0.83) <sup>*↓</sup>   |  |
| 3                                          | Pomarico (2009)      |                |                | 25   | 15   |                                         | 0.17 | (0.02,1.22) <sup>NS</sup>   |  |
| Subgroup                                   |                      |                |                |      |      |                                         | 0.35 | (0.19,0.63) <sup>*↓</sup>   |  |
| 1                                          | Oliscovicz (2015)    | CLWH MT        | CLWH NMD       | 46   | 14   |                                         | 0.96 | (0.04,24.90) <sup>NS</sup>  |  |
| 1                                          | Jose (2013)          | CLWH cART      | CLWH NMD       | 47   | 53   |                                         | 0.77 | (0.33,1.76) <sup>NS</sup>   |  |
| 2                                          | Konstantyner (2013)  |                |                | 182  | 89   |                                         | 0.19 | (0.11,0.33) <sup>*↓</sup>   |  |
| 3                                          | Oliscovicz (2015)    |                |                | 51   | 14   |                                         | 0.87 | (0.03,22.48) <sup>NS</sup>  |  |
| 4                                          | Pomarico (2009)      |                |                | 24   | 16   |                                         | 0.30 | (0.05,1.64) <sup>NS</sup>   |  |
| 5                                          | Ponnam (2012)        |                |                | 95   | 95   |                                         | 0.52 | (0.26,1.03) <sup>NS</sup>   |  |
| Subgroup                                   |                      |                |                |      |      |                                         | 0.35 | (0.24,0.51) <sup>*↓</sup>   |  |
| 1                                          | Konstantyner (2013)  | CLWH Post-cART | CLWH Pre- cART | 137  | 284  |                                         | 0.33 | (0.21,0.53) <sup>*↓</sup>   |  |
| 2                                          | Prasitsuebsai (2012) |                |                | 1480 | 2129 |                                         | 0.15 | (0.11,0.21) <sup>*↓</sup>   |  |
| 1                                          | Prasitsuebsai (2012) | CLWH MT/DT     | CLWH Pre-MT/DT | 272  | 2129 |                                         | 1.06 | (0.76,1.46) <sup>*↓</sup>   |  |
| Overall                                    |                      |                |                |      |      |                                         | 0.37 | (0.31,0.44) <sup>*↓</sup>   |  |
| 1                                          | Baghirath (2013)     | CLWH ART       | CLWH NMD       | 50   | 50   |                                         | 0.13 | (0.01,2.67) <sup>NS</sup>   |  |

|                                                   |                      |                |              |      |      |                                                       |       |                             |
|---------------------------------------------------|----------------------|----------------|--------------|------|------|-------------------------------------------------------|-------|-----------------------------|
| 2                                                 | Divarkar (2015)      |                | CLWH NMD     | 62   | 55   | Oral hairy leukoplakia <sup>a</sup>                   | 0.12  | (0.01, 2.38) <sup>NS</sup>  |
| 3                                                 | Jose (2013)          | CLWH cART      | CLWH NMD     | 47   | 44   |                                                       | 2.75  | (0.39,19.43) <sup>NS</sup>  |
| Overall                                           |                      |                |              |      |      |                                                       | 0.67  | (0.16,2.80) <sup>NS</sup>   |
| 1                                                 | Prasitsuebsai (2014) | CLWH Post-cART | CLWH Pre-ART | 1480 | 2129 | Acute necrotizing ulcerative gingivitis/periodonitits | 0.00  | (0.00,0.03) *↓              |
|                                                   |                      | CLWH MT/DT     | CLWH Pre-ART | 272  | 2129 |                                                       | 0.00  | (0.00,0.02) *↓              |
| Overall                                           |                      |                |              |      |      |                                                       | 0.00  | (0.00,0.02) *↓              |
| Oral health-related WHO clinical staging 4        |                      |                |              |      |      |                                                       |       |                             |
| 1                                                 | Jose (2013)          | CLWH cART      | CLWH NMD     | 47   | 53   | Chronic herpes simplex infection                      | 2.75  | (0.39,19.43) <sup>NS</sup>  |
| 2                                                 | Oliscovicz (2015)    | CLWH cART      | CLWH NMD     | 51   | 46   |                                                       | 0.87  | (0.03,22.48) <sup>NS</sup>  |
|                                                   |                      | CLWH MT        | CLWH NMD     | 46   | 14   |                                                       | 2.03  | (0.38,10.83) <sup>NS</sup>  |
| Overall                                           |                      |                |              |      |      |                                                       | 2.47  | (0.88,6.97) <sup>NS</sup>   |
| 1                                                 | Prasitsuebsai (2014) | CLWH cART      | CLWH NMD     | 1480 | 2129 | Kaposi's sarcoma <sup>a</sup>                         | 0.00  | (0.00,0.03) *↓              |
|                                                   |                      | CLWH MT/DT     |              | 272  | 2129 |                                                       | 0.00  | (0.00,0.03) *↓              |
| Overall                                           |                      |                |              |      |      |                                                       | 0.00  | (0.00,0.03) *↓              |
| Other oral-health related diseases and conditions |                      |                |              |      |      |                                                       |       |                             |
| 1                                                 | Baghirath (2013)     | CLWH ART       | CLWH NMD     | 50   | 50   | Hyperpigmentation <sup>a</sup>                        | 12.21 | (0.66,226.97) <sup>NS</sup> |
| 2                                                 | Divarkar (2015)      | CLWH ART       | CLWH NMD     | 62   | 55   |                                                       | 0.64  | (0.22,1.92) <sup>NS</sup>   |
| 3                                                 | Jose (2013)          | CLWH cART      | CLWH NMD     | 47   | 54   |                                                       | 1.14  | (0.29,4.47) <sup>NS</sup>   |
| 4                                                 | Ponnan (2012)        | CLWH cART      | CLWH NMD     | 95   | 95   |                                                       | 8.93  | (2.30,34.60) *↑             |
| Overall                                           |                      |                |              |      |      |                                                       | 1.79  | (0.89,3.61) <sup>NS</sup>   |
| 1                                                 | Ponnan (2012)        | CLWH cART      | CLWH NMD     | 233  | 55   | Mucocele <sup>a</sup>                                 | 0.02  | (0.00,1.09) <sup>NS</sup>   |
| 1                                                 | Ponnan (2012)        | CLWH cART      | CLWH NMD     | 95   | 95   | Ulcerative stomatitis                                 | 0.03  | (0.02,0.07) *↓              |

Legend of table:

\*↑ :Significantly higher

\*↓ :Significantly lower

<sup>a</sup> Adjusted OR was calculated with a fixed value (0.5) added to each cell in the 2x2 tables for zero-cell corrections

Note. ART= antiretroviral therapy; cART= combined antiretroviral therapy; CLWH= children living with HIV; dmft/DMFT= decayed, missing, filled teeth for primary/permanent dentition; DMFS/dmfs = decayed, missing, filled tooth surface for primary/permanent dentition; DT= dual-therapy; CLWH, HIV; MD= Under medications; MT= Monotherapy; NR= Not reported; NRTI= nucleoside reverse transcriptase inhibitor; NNRTI = non-nucleoside reverse transcriptase inhibitors; NMD= No medication; OR = odds ratio; PI= protease inhibitors; SMD = standardized mean difference; 95% CI = 95% confidence interval.

**Table S2. Comparison of HIV-infected individuals under different antiretroviral medications.**

| Study (Year)                               |                      | Exposure  | Control    | Number of subjects |         | Outcomes                                    |                                  |                            |
|--------------------------------------------|----------------------|-----------|------------|--------------------|---------|---------------------------------------------|----------------------------------|----------------------------|
|                                            |                      |           |            | Exposure           | Control |                                             |                                  |                            |
| Dental caries prevalence and severity      |                      |           |            |                    |         |                                             |                                  |                            |
|                                            |                      |           |            |                    |         |                                             | Mean (SD)                        |                            |
| 1                                          | Oliscovicz (2015)    | CLWH cART | CLWH ART   | 51                 | 46      | DMFT                                        | cART: 3.2 (NR)<br>ART: 2.8 (NR)  |                            |
|                                            |                      | CLWH cART | CLWH ART   | 51                 | 46      | dmft                                        | cART: 1.9 (NR)<br>ART: 1.6 (NR)  |                            |
| 2                                          | Birungi (2020)       | CLWH PI   | CLWH NRTI  | 80                 | 84      | DMFT/dmft                                   | PI: 1.7 (2.4)<br>NRTI: 2.3 (2.7) |                            |
|                                            |                      | Exposure  | Control    | Exposure           | Control |                                             | OR                               | 95% CI                     |
| 1                                          | Birungi (2020)       | CLWH PI   | CLWH NRTI  | 80                 | 84      | DMFT/dmft                                   | 0.98                             | (0.57, 1.67) <sup>NS</sup> |
| Oral hygiene and periodontal status        |                      |           |            |                    |         |                                             |                                  |                            |
| 1                                          | Oliscovicz (2015)    | CLWH cART | CLWH ART   | 51                 | 46      | Gingivitis                                  | 2.00                             | (0.63,6.36) <sup>NS</sup>  |
| Oral health-related WHO clinical staging 2 |                      |           |            |                    |         |                                             |                                  |                            |
|                                            | None                 |           |            |                    |         | Angular cheilitis                           | (Nil)                            | (Nil)                      |
| 1                                          | Oliscovicz (2015)    | CLWH MT   | CLWH NMD   | 51                 | 46      | Linear gingival erythema <sup>a</sup>       | 0.22                             | (0.03,1.97) <sup>NS</sup>  |
| 1                                          | Oliscovicz (2015)    | CLWH cART | CLWH MT    | 51                 | 46      | Recurrent oral ulcerations                  | 1.11                             | (0.07,18.24) <sup>NS</sup> |
| 1                                          | Oliscovicz (2015)    | CLWH cART | CLWH MT    | 51                 | 46      | Persistent parotid enlargement <sup>a</sup> | 0.06                             | (0.01,0.28) <sup>*</sup> ↓ |
| Oral health-related WHO clinical staging 3 |                      |           |            |                    |         |                                             |                                  |                            |
| 1                                          | Fangan (2000)        | CLWH cART | CLWH RTI   | 24                 | 25      | Oral candidiasis                            | 0.38                             | (0.08,1.76) <sup>NS</sup>  |
| 2                                          | Konstantyner (2013)  | CLWH cART | CLWH MT    | 182                | 82      |                                             | 0.46                             | (0.26,0.83) <sup>*</sup> ↓ |
| 3                                          | Konstantyner (2013)  | CLWH cART | CLWH DT    | 182                | 66      |                                             | 0.15                             | (0.08,0.29) <sup>*</sup> ↓ |
| 4                                          | Oliscovicz (2015)    | CLWH cART | CLWH MT    | 51                 | 46      |                                             | 0.90                             | (0.05,14.83) <sup>NS</sup> |
| 5                                          | Prasitsuebsai (2012) | CLWH cART | CLWH MT/DT | 1480               | 272     |                                             | 0.15                             | (0.10,0.22) <sup>*</sup> ↓ |
| Overall                                    |                      |           |            |                    |         |                                             | 0.22                             | (0.16,0.29) <sup>*</sup> ↓ |



|                                                          |                      |                |            |      |     |                                                              |       |                            |
|----------------------------------------------------------|----------------------|----------------|------------|------|-----|--------------------------------------------------------------|-------|----------------------------|
|                                                          | None                 |                |            |      |     | <b>Recurrent oral candidiasis</b>                            | (Nil) | (Nil)                      |
|                                                          | None                 |                |            |      |     | <b>Pseudo-membranous candidiasis</b>                         | (Nil) | (Nil)                      |
|                                                          | None                 |                |            |      |     | <b>Erythematous candidiasis</b>                              | (Nil) | (Nil)                      |
|                                                          | None                 |                |            |      |     | <b>Oral hairy leukoplakia</b>                                | (Nil) | (Nil)                      |
| <b>1</b>                                                 | Prasitsuebsai (2014) | CLWH Post-cART | CLWH MT/DT | 1480 | 272 | <b>Acute necrotizing ulcerative gingivitis/periodontitis</b> | 0.06  | (0.00, 1.50) <sup>NS</sup> |
| <b>Oral health-related WHO clinical staging 4</b>        |                      |                |            |      |     |                                                              |       |                            |
| 1                                                        | Oliscovicz (2015)    | CLWH cART      | CLWH MT    | 51   | 46  | <b>Chronic herpes simplex infection<sup>a</sup></b>          | 0.01  | (0.00, 0.20) *↓            |
| 2                                                        | Prasitsuebsai (2014) | CLWH cART      | CLWH MT    | 1480 | 272 | <b>Kaposi's sarcoma<sup>a</sup></b>                          | 0.00  | (0.00, 0.22) *↓            |
| <b>Other oral health-related diseases and conditions</b> |                      |                |            |      |     |                                                              |       |                            |
|                                                          | None                 |                |            |      |     | <b>Hyperpigmentation</b>                                     | (Nil) | (Nil)                      |
|                                                          | None                 |                |            |      |     | <b>Mucocele</b>                                              | (Nil) | (Nil)                      |
|                                                          | None                 |                |            |      |     | <b>Ulcerative stomatitis</b>                                 | (Nil) | (Nil)                      |

Legend of table:

\*↑ :Significantly higher

\*↓ :Significantly lower

<sup>a</sup> Adjusted OR was calculated with a fixed value (0.5) added to each cell in the 2x2 tables for zero-cell corrections

Note. ART= antiretroviral medication; cART= combined antiretroviral therapy; CLWH= children living with HIV dmft/DMFT= decayed, missing, filled teeth for primary/permanent dentition; DMFS/dmfs = decayed, missing, filled tooth surface for primary/permanent dentition; DT= dual-therapy; MD= Under medications; MT= Monotherapy; NR= Not reported; NRTI= nucleoside reverse transcriptase inhibitor; NNRTI = non-nucleoside reverse transcriptase inhibitors; NMD= No medication; OR = odds ratio; PI= protease inhibitors; RTI= reverse transcriptase inhibitors ; SMD = standardized mean difference; 95% CI = 95% confidence interval.

## Supplemental Material 3. Figures

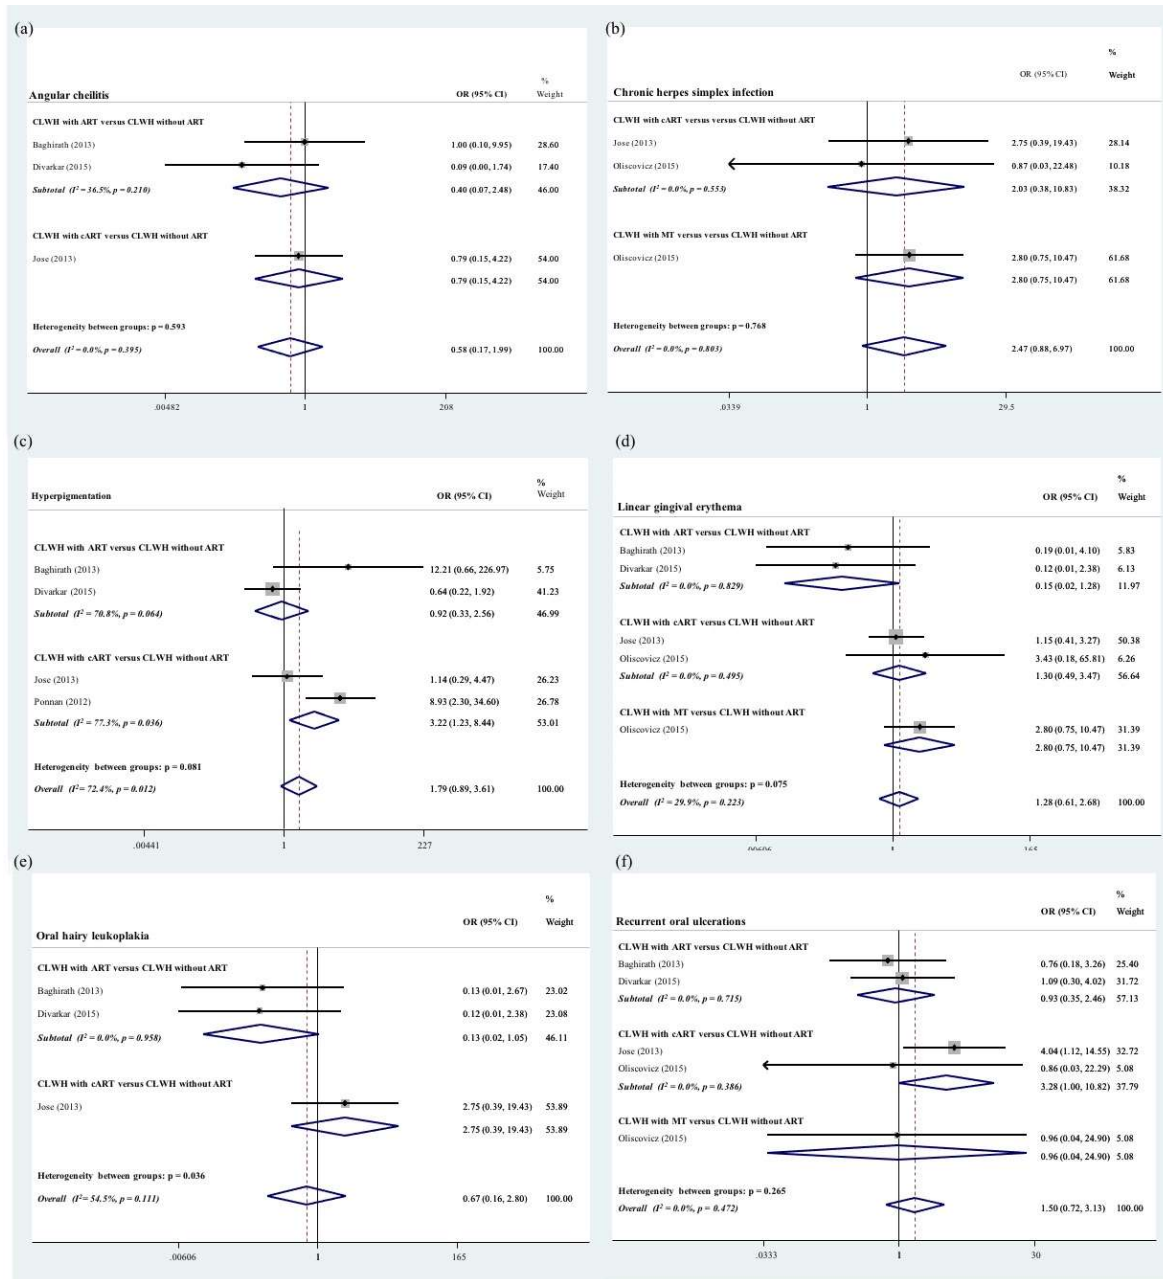

**Figure S1.** Prevalence of (a) angular cheilitis (b) chronic herpes simplex infection (c) hyperpigmentation (d) linear gingival erythema (e) oral hairy leukoplakia (f) recurrent oral ulcerations between CLWH with and without ART.

Note. ART= antiretroviral medication; cART= combined antiretroviral therapy; CLWH=children living with HIV; DT= dual-therapy; MT= Monotherapy; OR = odds ratio; 95% CI = 95% confidence interval
